# Supplementary material
Source: publisher site journal article supplement (https://www.dovepress.com/article/366844)
Supplement: Supplementary file 1 [file get_supplementary_file.php]

**Supplemental table 1** The FPRP and statistical power values of the positive results in this study.

| **SNP ID** | **Model** | **Genotype** | **OR (95%CI)** | ***p*** | **Statistical Power a (%)** | **Prior probability** | | |
| --- | --- | --- | --- | --- | --- | --- | --- | --- |
| **0.25** | **0.1** | **0.01** |
| **Overall analysis** |  |  |  |  |  |  |  |  |
| rs2201584 | Allele | A | 1.23 (1.02-1.48) | 0.033 | 100.0 | 0.078 b | 0.203 | 0.737 |
|  | Codominant | AA | 1.76 (1.15-2.69) | 0.009 | 72.3 | 0.036 b | 0.101 b | 0.552 |
|  | Recessive | AA | 1.72 (1.15-2.57) | 0.008 | 76.9 | 0.031 b | 0.087 b | 0.511 |
|  | Log-additive | --- | 1.24 (1.02-1.50) | 0.028 | 100.0 | 0.074 b | 0.194 b | 0.726 |
| rs1874791 | Allele | A | 1.36 (1.10-1.68) | 0.004 | 100.0 | 0.013 b | 0.038 b | 0.301 |
|  | Codominant | AA | 2.17 (1.18-3.99) | 0.013 | 39.6 | 0.087 b | 0.223 | 0.760 |
|  | Dominant | GA-AA | 1.36 (1.04-1.77) | 0.025 | 99.8 | 0.063 b | 0.167 b | 0.688 |
|  | Recessive | AA | 1.99 (1.09-3.64) | 0.022 | 50.6 | 0.131 b | 0.312 | 0.833 |
|  | Log-additive | --- | 1.35 (1.09-1.69) | 0.007 | 100.0 | 0.026 b | 0.074 b | 0.466 |
| **Age ≤ 68 years** |  |  |  |  |  |  |  |  |
| rs2201584 | Recessive | AA | 1.74 (1.06-2.84) | 0.029 | 71.1 | 0.101 b | 0.253 | 0.788 |
| rs1874791 | Codominant | GA | 1.48 (1.00-2.18) | 0.048 | 93.6 | 0.131 b | 0.312 | 0.833 |
|  | Dominant | GA-AA | 1.49 (1.04-2.13) | 0.029 | 94.7 | 0.083 b | 0.214 | 0.750 |
|  | Log-additive | --- | 1.38 (1.02-1.85) | 0.035 | 99.3 | 0.086 b | 0.221 | 0.757 |
| rs6679356 | Allele | C | 0.57 (0.42-0.79) | 0.001 | 78.4 | 0.003 b | 0.008 b | 0.085 b |
|  | Dominant | TC-CC | 0.49 (0.23-1.04) | 0.048 | 47.9 | 0.284 | 0.543 | 0.929 |
|  | Log-additive | --- | 0.49 (0.23-1.02) | 0.042 | 47.8 | 0.262 | 0.515 | 0.921 |
| **Age > 68 years** |  |  |  |  |  |  |  |  |
| rs1874791 | Recessive | AA | 3.89 (1.15-13.17) | 0.011 | 14.2 | 0.379 | 0.647 | 0.953 |
| **Female** |  |  |  |  |  |  |  |  |
| rs2201584 | Codominant | AA | 2.57 (1.25-5.29) | 0.010 | 24.8 | 0.112 b | 0.274 | 0.806 |
|  | Recessive | AA | 2.33 (1.11-4.89) | 0.021 | 34.3 | 0.181 b | 0.399 | 0.880 |
|  | Log-additive | --- | 1.43 (1.02-2.01) | 0.038 | 97.3 | 0.109 b | 0.267 | 0.801 |
| **Male** |  |  |  |  |  |  |  |  |
| rs1874791 | Allele | A | 1.40 (1.08-1.82) | 0.012 | 99.6 | 0.035 b | 0.097 b | 0.543 |
|  | Codominant | AA | 2.56 (1.17-5.60) | 0.018 | 26.8 | 0.172 b | 0.384 | 0.873 |
|  | Dominant | GA-AA | 1.45 (1.03-2.04) | 0.032 | 96.8 | 0.093 b | 0.234 | 0.771 |
|  | Recessive | AA | 2.20 (1.02-4.75) | 0.039 | 40.4 | 0.249 | 0.499 | 0.916 |
|  | Log-additive | --- | 1.44 (1.08-1.91) | 0.011 | 98.9 | 0.033 b | 0.094 b | 0.533 |
| **Smoking** |  |  |  |  |  |  |  |  |
| rs1874791 | Allele | A | 1.40 (1.08-1.82) | 0.012 | 99.6 | 0.035 b | 0.097 b | 0.543 |
|  | Log-additive | --- | 1.43 (1.01-2.03) | 0.041 | 97.0 | 0.123 b | 0.296 | 0.823 |
| **Drinking** |  |  |  |  |  |  |  |  |
| rs2201584 | Codominant | AA | 2.00 (1.09-3.67) | 0.025 | 50.0 | 0.131 b | 0.312 | 0.833 |
|  | Recessive | AA | 2.11 (1.18-3.76) | 0.010 | 42.8 | 0.073 b | 0.192 b | 0.723 |
| rs1874791 | Codominant | AA | 3.77 (1.45-9.80) | 0.007 | 9.7 | 0.167 b | 0.376 | 0.869 |
|  | Recessive | AA | 3.66 (1.42-9.43) | 0.004 | 10.5 | 0.170 b | 0.381 | 0.871 |
|  | Log-additive | --- | 1.41 (1.03-1.93) | 0.030 | 98.5 | 0.089 b | 0.226 | 0.762 |
| rs3790567 | Codominant | AA | 2.68 (1.18-6.09) | 0.019 | 24.2 | 0.187 b | 0.408 | 0.884 |
|  | Recessive | AA | 2.92 (1.31-6.53) | 0.006 | 17.8 | 0.132 b | 0.314 | 0.834 |

FPRP: false-positive report probability.

a Statistical power a was calculated using the number of observations in the subgroup and the OR and p values in this table.

b The level of false-positive report probability threshold was set at 0.2, and ‘b’ and bold text indicate noteworthy findings.
